# Supplementary material for: Ecology and evolution of facilitation among symbionts
Source: PubMed Central journal article supplement (PMC6242936; doi:10.1038/s41467-018-06779-w), 2018-11-19
Supplement: 41467_2018_6779_MOESM1_ESM.pdf [file 41467_2018_6779_MOESM1_ESM.pdf]

## Supplementary Material

### Ecology and Evolution of facilitation among parasites: causes and consequences

Zélé F.<sup>1</sup>, Magalhães S.<sup>1</sup>, Kéfi S.<sup>2</sup>, and Duncan A.B.<sup>2</sup>

1. cE3c: Centre for Ecology, Evolution, and Environmental Changes, Faculty of Sciences, University of Lisbon, Edifício C2, 38 piso, 1749-016 Lisboa, Portugal

2. Institut des Sciences de l'Évolution, Université de Montpellier, CNRS, IRD, EPHE, CC065, Place Eugène Bataillon, 34095 Montpellier Cedex 05, France

Corresponding author: Duncan A.B. ([alison.duncan@umontpellier.fr](mailto:alison.duncan@umontpellier.fr))

**Supplementary Table 1. Examples of selected studies that have shown facilitation between parasites.** 1<sup>st</sup> column: host species full name, strains, genotypes, varieties, or breed (when applicable). 2<sup>nd</sup> and 3<sup>rd</sup> columns: "Facilitator" and "Facilitated" parasites species full names, strains, genotypes, or varieties (when applicable), and mode of transmission (H: horizontally; V: vertically; M: mixed transmission mode). 4<sup>th</sup> column: symmetry of the interaction ("+": positive; "-": negative; "0": neutral; "?": unknown effect for each partner of the interaction; 1st: facilitator; second: facilitated). 5<sup>th</sup> column: order of infection (F<sup>R</sup>: facilitator; F<sup>D</sup>: facilitated), and time interval between infections for sequential infections; "simultaneous": both parasites were inoculated at the same time. 6<sup>th</sup> to 8<sup>th</sup> columns: effect of facilitation on infection "success" (i.e. establishment, occurrence or prevalence), infection "intensity" (i.e. parasite load, growth, and/or development), and transmission of facilitated parasites. 9<sup>th</sup> column: consequences for the host fitness (i.e. virulence). 10<sup>th</sup> column: underlying mechanism when known; 11<sup>th</sup> column: type of study (L: laboratory; F: field; R: review; M: meta-analysis); 12<sup>th</sup> column: reference(s). Other abbreviations: ↑: increase; ↓: decrease; ↔: not affected; "?": unknown; "-": not studied; "na": not applicable.

| Host                                                                              | Facilitator                                                  | Facilitated                                                            | Sym. | Infection order | success                     | intensity | transm.        | host fitness   | Mechanism                                        | Type                      | Ref.  |
|-----------------------------------------------------------------------------------|--------------------------------------------------------------|------------------------------------------------------------------------|------|-----------------|-----------------------------|-----------|----------------|----------------|--------------------------------------------------|---------------------------|-------|
| Rabbit<br>( <i>Oryctolagus cuniculus</i> )                                        | strongylid nematode<br>( <i>Graphidium strigosum</i> )       | H<br>strongylid nematode<br>( <i>Trichostrongylus retortaeformis</i> ) | H    | -/+             | na                          | -         | ↑              | -              | -                                                | ?                         | F [1] |
| Nematode<br>( <i>Caenorhabditis elegans</i> ;<br>strain N2 wild-type)             | <i>Staphylococcus aureus</i><br>(bacteria; strain MSSA 476)  | H<br><i>Enterococcus faecalis</i><br>(bacteria; strain OG1RF)          | H    | -/+             | simultaneous                | -         | ↑              | -              | ↑ mortality                                      | Supplied-product          | L [2] |
| Fruit fly<br>( <i>Drosophila simulans</i> ; strain<br>Riverside)                  | <i>Wolbachia</i><br>(alphaproteobacteria; strain wRi)        | V<br>Parasitoid wasp<br>( <i>Leptopilina heterotoma</i> )              | H    | -/+             | na                          | ↑         | -              | -              | ↑ mortality ↓ size<br>↓ fecundity ↓ defences     | Immunosuppression         | L [3] |
| spider mite<br>( <i>Tetranychus piercei</i> )                                     | <i>Wolbachia</i><br>(alphaproteobacteria)                    | V<br><i>Cardinium</i><br>(flavobacterium)                              | V    | -/+             | na                          | -         | ↑              | ↑ <sup>a</sup> | ↑ fitness relative to<br>uninfected hosts        | Reproductive manipulation | L [4] |
| Tomato leaflets<br>( <i>Solanum lycopersicum</i> , cv<br>Heinz)                   | Spider mite<br>( <i>T. urticae</i> , 4 populations)          | H<br>Spider mites<br>( <i>Tetranychus evansi</i> , 2 pop.)             | H    | -/+             | simultaneous                | -         | ↑ <sup>b</sup> | -              | na                                               | ?                         | L [5] |
| Tomato plant<br>( <i>Solanum lycopersicum</i> cv<br>Castlemart, 35S::prosystemin) | Spider mites<br>( <i>T. evansi</i> , Algarrobo1 and Viçosa1) | H<br>Spider mite<br>( <i>T. urticae</i> , Santpoort-2)                 | H    | -/+             | simultaneous;<br>no contact | -         | ↑              | -              | ↓ defence gene<br>expression <sup>c</sup>        | Immunosuppression         | L [6] |
|                                                                                   | Spider mites<br>( <i>T. urticae</i> , DeLier-1)              | H<br>Spider mite<br>( <i>T. urticae</i> , Santpoort-2)                 | H    | -/+             | simultaneous;<br>no contact | -         | ↑              | -              | ↓ defence (late) gene<br>expression <sup>c</sup> | Immunosuppression         |       |

| Host                                                                               | Facilitator                                                                              | Facilitated                                                                               | Sym. | Infection order | success | intensity                                                             | transm. | host fitness   | Mechanism      | Type                                        | Ref.                                                     |   |       |
|------------------------------------------------------------------------------------|------------------------------------------------------------------------------------------|-------------------------------------------------------------------------------------------|------|-----------------|---------|-----------------------------------------------------------------------|---------|----------------|----------------|---------------------------------------------|----------------------------------------------------------|---|-------|
| Tomato plant<br>( <i>Solanum lycopersicum</i> cv Santa Clara- 5300)                | Spider mites<br>( <i>Tetranychus evansi</i> )                                            | Spider mite<br>( <i>Tetranychus urticae</i> )                                             | H    | H               | -/+     | F <sup>R</sup> then F <sup>D</sup><br>(0-4,7 days);<br>no coinfection | -       | ↑ <sup>d</sup> | -              | ↓ JA-inducible defences                     | Immunosuppression                                        | L | [7,8] |
| Tomato plant<br>( <i>Solanum lycopersicum</i> )                                    | Tomato russet mite<br>( <i>Aculops lycopersici</i> )                                     | Spider mites<br>( <i>Tetranychus urticae</i> )                                            | H    | H               | -/+     | simultaneous                                                          | -       | ↑              | -              | ↑ SA- ↓ JA-inducible defences               | Immunosuppression<br>Immune trade-off                    | L | [9]   |
| Humans<br>( <i>Homo sapiens</i> )                                                  | Human immunodeficiency virus type 1 (HIV-1)                                              | Malaria parasite<br>( <i>P. falciparum</i> ; protozoan)                                   | M    | H               | +/+     | F <sup>R</sup> then F <sup>D</sup> (na)                               | ↑       | ↑              | -              | ↓ defences ↑ anemia ↑ postnatal mortality   | Immunosuppression                                        | R | [10]  |
|                                                                                    | Malaria parasite<br>( <i>P. falciparum</i> ; protozoan)                                  | Human immunodeficiency virus type 1 (HIV-1)                                               | M    | H               | +/+     | F <sup>R</sup> then F <sup>D</sup> (na)                               | -       | ↑              | -              |                                             | Immune-mediated                                          |   |       |
| Humans<br>( <i>Homo sapiens</i> )                                                  | Herpes simplex virus (HSV2)                                                              | Human immunodeficiency virus type 1 (HIV-1)                                               | H    | M               | +/+     | na                                                                    | ?       | ↑              | ?              | ↑ Mucocutaneous lesions ↑ disease severity  | Immune/ressource-mediated<br>Transactivation /mechanical | R | [11]  |
|                                                                                    | Human immunodeficiency virus type 1 (HIV-1)                                              | Herpes simplex virus (HSV2)                                                               | H    | M               | +/+     | na                                                                    | ↑       | ↑              | ↑              | ↑ disease severity                          | immunosuppression                                        |   |       |
| Ex vivo lymphoid tissue<br>( <i>Homo sapiens</i> )                                 | Human immunodeficiency virus type 1 (HIV-1)                                              | Human cytomegalovirus (HCMV)                                                              | M    | M               | +/+     | F <sup>D</sup> then F <sup>R</sup><br>(overnight)                     | -       | ↑              | -              | -                                           | Immunosuppression<br>Ressource-mediated                  | L | [12]  |
| Ex vivo semen<br>( <i>Homo sapiens</i> )                                           | Human cytomegalovirus (HCMV)                                                             | Human immunodeficiency virus type 1 (HIV-1)                                               | M    | M               | +/+     | unknown                                                               | -       | ↑              | -              | -                                           | ?                                                        | L | [13]  |
| Mice<br>( <i>Mus musculus</i> ; strain BALB/c)                                     | <i>Bordatella bronchiseptica</i><br>(bacteria; strain RB50)                              | Helminth<br>( <i>Heligmosomoides polygyrus</i> )                                          | H    | H               | +/+     | simultaneous                                                          | ↑       | ↑              | ↑ <sup>e</sup> | ↑ mortality                                 | ?                                                        | L | [14]  |
|                                                                                    | Helminth<br>( <i>Heligmosomoides polygyrus</i> )                                         | <i>Bordatella bronchiseptica</i><br>(bacteria; strain RB50)                               | H    | H               | +/+     |                                                                       | -       | ↑              | -              |                                             |                                                          |   |       |
| Mice<br>( <i>Mus musculus</i> ; strain BALB/c)                                     | Canine influenza virus<br>(CIV; strain H3N2)                                             | <i>Staphylococcus pseudintermedius</i><br>(bacteria)                                      | H    | H               | +/+     | F <sup>R</sup> then F <sup>D</sup> (72h)                              | -       | ↑              | -              | ↑ weight loss ↑ brain lesions ↑ lung injury | ?                                                        | L | [15]  |
|                                                                                    | <i>Staphylococcus pseudintermedius</i><br>(bacteria)                                     | Canine influenza virus<br>(CIV; strain H3N2)                                              | H    | H               | +/+     | F <sup>D</sup> then F <sup>R</sup> (72h)                              | -       | ↑              | -              |                                             |                                                          |   |       |
| Rabbit<br>( <i>Oryctolagus cuniculus</i> )                                         | Anoplocephaloid cestodes<br>( <i>Mosgovoyia pectinata</i> )                              | Oxyurid nematode<br>( <i>Passalurus ambiguus</i> )                                        | H    | H               | +/+     | na                                                                    | -       | ↑              | -              | -                                           | ?                                                        | F | [1]   |
|                                                                                    | Oxyurid nematode<br>( <i>Passalurus ambiguus</i> )                                       | Anoplocephaloid cestodes<br>( <i>Mosgovoyia pectinata</i> )                               | H    | H               | +/+     | na                                                                    | -       | ↑              | -              | -                                           | ?                                                        |   |       |
| Marine worm<br>( <i>Olavius algarvensis</i> )                                      | Sulphur-oxidizers<br>gammaproteobacterial symbionts<br>(γ1 and γ3)                       | Sulphate-reducers<br>deltaproteobacterial symbionts (δ1<br>and δ4)                        | ?    | ?               | +/+     | na                                                                    | -       | -              | -              | Allow survival <sup>f</sup>                 | Supplied-product                                         | M | [16]  |
| Shrimps<br>( <i>Artemia franciscana</i> and <i>A. parthenogenetica</i> )           | Cestode<br>( <i>Flamingolepis liguloides</i> )                                           | Microsporidia<br>( <i>Anostracospira rigaudi</i> and<br><i>Enterocytozpora artemiae</i> ) | H    | H               | +/+     | na                                                                    | -       | -              | ↑              | na                                          | Behavioural manipulation                                 | F | [17]  |
| Diverse arthropod hosts<br>(Lepidoptera, Coleoptera,<br>Hymenoptera and Hemiptera) | Ichneumonoid parasitoid wasps<br>( <i>Braconidae</i> and <i>Ichneumonidae</i> )          | Polydnaviruses ( <i>Polydnaviridae</i> :<br><i>Bracovirus</i> and <i>Ichnovirus</i> )     | H    | V               | +/+     | na                                                                    | ↑       | -              | ↑              | -                                           | Nested parasite                                          | R | [18]  |
|                                                                                    | Polydnaviruses ( <i>Polydnaviridae</i> :<br><i>Bracovirus</i> and <i>Ichnovirus</i> )    | Ichneumonoid parasitoid wasps<br>( <i>Braconidae</i> and <i>Ichneumonidae</i> )           | H    | V               | +/+     | na                                                                    | ↑       | -              | -              | ↑ mortality                                 | Immune-mediated                                          |   |       |
| Mosquito<br>( <i>Anopheles stephensi</i> )                                         | Malaria parasite<br>( <i>P. chabaudi</i> ; strain AJ; protozoan)                         | Malaria parasite<br>( <i>P. chabaudi</i> ; strain ER; protozoan)                          | H    | H               | +/+     | F <sup>R</sup> then F <sup>D</sup> (4 days)                           | ↑       | ↑              | -              | ↔ survival                                  | ?                                                        | L | [19]  |
|                                                                                    | Malaria parasite<br>( <i>P. chabaudi</i> ; strain ER; protozoan)                         | Malaria parasite<br>( <i>P. chabaudi</i> ; strain AJ; protozoan)                          | H    | H               | +/+     | F <sup>R</sup> then F <sup>D</sup> (4 days)                           | ↑       | ↑              | -              | ↔ survival                                  | ?                                                        |   |       |
| Spider mite<br>( <i>Tetranychus phaselus</i> )                                     | <i>Wolbachia</i> (alphaproteobacteria;<br>wCon) and <i>Cardinium</i><br>(flavobacterium) | <i>Wolbachia</i><br>(alphaproteobacteria; wOri)                                           | V    | V               | +/+     | na                                                                    | -       | -              | ↑ <sup>a</sup> | ↓ fecundity <sup>g</sup><br>↔ longevity     | Reproductive manipulation                                | L | [20]  |
|                                                                                    | <i>Wolbachia</i><br>(alphaproteobacteria; wOri)                                          | <i>Wolbachia</i> (alphaproteobacteria;<br>wCon) and <i>Cardinium</i><br>(flavobacterium)  | V    | V               | +/+     | na                                                                    | -       | ↑ <sup>h</sup> | ↔              | ↓ fecundity <sup>g</sup><br>↑ longevity     | ?                                                        |   |       |

| Host                                                                   | Facilitator                                                                                | Facilitated                                                                                                 | Sym.  | Infection order                                                          | success | intensity      | transm.        | host fitness                                   | Mechanism                            | Type | Ref.    |
|------------------------------------------------------------------------|--------------------------------------------------------------------------------------------|-------------------------------------------------------------------------------------------------------------|-------|--------------------------------------------------------------------------|---------|----------------|----------------|------------------------------------------------|--------------------------------------|------|---------|
| Spider mite<br>( <i>Tetranychus truncates</i> )                        | <i>Cardinium</i> (flavobacterium)                                                          | V <i>Wolbachia</i> (alphaproteobacteria)                                                                    | V +/+ | na                                                                       | -       | ↑              | ↑ <sup>a</sup> | ↑ fecundity<br>↔ longevity                     | Reproductive manipulation            | L    | [21]    |
|                                                                        | <i>Wolbachia</i> (alphaproteobacteria)                                                     | V <i>Cardinium</i> (flavobacterium)                                                                         | V +/+ | na                                                                       | -       | ↑              | ↑ <sup>a</sup> | ↑ fecundity ↔<br>longevity                     | Reproductive manipulation            |      |         |
| Tomato plant<br>( <i>Solanum lycopersicum</i> cv<br>MoneyMaker)        | Spider mite<br>( <i>Tetranychus evansi</i> )                                               | H Spider mite<br>( <i>Tetranychus evansi</i> or <i>T. ludeni</i> )                                          | H +/+ | F <sup>R</sup> then F <sup>D</sup> (2 days);<br>no coinfection           | -       | ↑              | -              | ↓ JA-inducible defences                        | Immunosuppression                    | L    | [22]    |
|                                                                        | Spider mite<br>( <i>Tetranychus ludeni</i> )                                               | H Spider mite<br>( <i>Tetranychus evansi</i> or <i>T. ludeni</i> )                                          | H +/+ | F <sup>R</sup> then F <sup>D</sup> (2 days);<br>no coinfection           | -       | ↑              | -              | ↓ JA-inducible defences                        | immunosuppression                    |      |         |
| Plantain plant<br>( <i>Plantago lanceolata</i> ; several<br>genotypes) | Powdery mildew fungus<br>( <i>Podosphaera plantaginis</i> ; strain 10)                     | H Powdery mildew fungus<br>( <i>Podosphaera plantaginis</i> ; strain 3)                                     | H +/+ | Simultaneous                                                             | ↑       | ↑              | ↑              | ↑ disease severity                             | ?                                    | LF   | [23,24] |
|                                                                        | Powdery mildew fungus<br>( <i>Podosphaera plantaginis</i> ; strain 3)                      | H Powdery mildew fungus<br>( <i>Podosphaera plantaginis</i> ; strain 10)                                    | H +/+ | Simultaneous                                                             | ↑       | ↑              | ↑              | ↑ disease severity                             | ?                                    |      |         |
| Pine moth ( <i>Panolis flammea</i> )                                   | Nucleopolyhedrovirus<br>(PfNPV; Pf4)                                                       | H Nucleopolyhedrovirus<br>(PfNPV; Pf6)                                                                      | H 0/+ | simultaneous                                                             | -       | ↑ <sup>h</sup> | -              | ↑ mortality<br>↔ time to kill                  | ?                                    | L    | [25]    |
| Rabbit<br>( <i>Oryctolagus cuniculus</i> )                             | anoplocephaloid cestode<br>( <i>Cittotaenia denticulata</i> )                              | H strongylid nematode<br>( <i>Trichostrongylus retortaeformis</i> )                                         | H 0/+ | na                                                                       | -       | ↑              | -              | -                                              | ?                                    | F    | [26]    |
| Pig<br>( <i>Sus scrofa domestica</i> ; "Large<br>White" breed)         | Scabies mite<br>( <i>Sarcoptes scabiei</i> , var. suis)                                    | H Bacteria<br>( <i>Staphylococcus aureus</i> and<br><i>Streptococcus pyogenes</i> )                         | H ?/+ | F <sup>R</sup> then F <sup>D</sup><br>(<21 weeks)                        | ↑       | ↑              | -              | ↓ skin microbiota                              | ?                                    | L    | [27]    |
| Mice<br>( <i>Mus musculus</i> ; strain BALB/c)                         | Live Attenuated Influenza Vaccine<br>(LAIV; attenuated variant of<br>HK/Syd, HK/Sydat(t)s) | H <i>Streptococcus pneumoniae</i><br>(bacteria; isolate ST425, serotype<br>19F)                             | H ?/+ | both ways (7 days)<br>or F <sup>R</sup> then F <sup>D</sup><br>(4 weeks) | -       | ↑              | -              | ↑ infection duration<br>↔ mortality            | ?                                    | L    | [28]    |
| Mice<br>( <i>Mus musculus</i> ; strain BALB/c)                         | Live Attenuated Influenza Vaccine<br>(LAIV; attenuated variant of<br>HK/Syd, HK/Sydat(t)s) | H <i>Staphylococcus aureus</i><br>(strains Wright and Newman)                                               | H ?/+ | F <sup>R</sup> then F <sup>D</sup><br>(1 and 7 days)                     | -       | ↑              | -              | ↑ infection duration<br>↔ mortality            | ?                                    |      |         |
| Mice<br>( <i>Mus musculus</i> ; strain<br>BALB/cbj)                    | Virus Influenza A<br>(strain H1N1; PR8)                                                    | H <i>Streptococcus pneumoniae</i><br>(bacteria; strain BHN54)                                               | H ?/+ | F <sup>R</sup> then F <sup>D</sup><br>(3 days)                           | ↑       | -              | -              | ↑ otitis media<br>↑ pneumonia                  | ?                                    | L    | [29]    |
| Mice<br>( <i>Mus musculus</i> ; strain<br>C57Bl/6)                     | Virus Influenza A<br>(strain H3N2; HKx31)                                                  | H <i>Pneumococci</i><br>(serotypes 23F and 4; strains P1121<br>and TIGR4, respectively)                     | H ?/+ | F <sup>R</sup> then F <sup>D</sup><br>(24h)                              | ↑       | ↑              | -              | ↑ mucus<br>↑ sialic acid (sugar)               | Resource-mediated                    | L    | [30]    |
| Mice<br>( <i>Mus musculus</i> ; strain MF1)                            | Malaria parasite<br>( <i>Plasmodium chabaudi</i> ; protozoan)                              | H Malaria parasite<br>( <i>Plasmodium yoelii</i> ; protozoan)                                               | H ?/+ | F <sup>R</sup> then F <sup>D</sup><br>(10 days)                          | -       | ↑              | -              | ↑ mortality ↑ anemia<br>(↓ RBC ↑ reticulocyte) | Immune-mediated<br>Resource-mediated | L    | [31]    |
| Mice<br>( <i>Mus musculus</i> ; strains<br>BALB/cByJ and C57Bl/6)      | Helminth worm<br>( <i>Taenia crassiceps</i> )                                              | H <i>Streptococcus pneumoniae</i><br>(type 2 strain D39, type 3 strain<br>A66.1, and type 19F strain BHN97) | H ?/+ | F <sup>R</sup> then F <sup>D</sup><br>(8-10 weeks)                       | -       | ↑ <sup>i</sup> | -              | ↑ weight loss<br>↑ mortality                   | ?                                    | L    | [32]    |
| Ferret<br>( <i>Mustela putorius furo</i> )                             | Virus Influenza<br>(strain H3N2)                                                           | H <i>Streptococcus pneumoniae</i><br>(bacteria; strain BHN97)                                               | H ?/+ | F <sup>R</sup> then F <sup>D</sup><br>(3 days)                           | ↑       | -              | ↑              | ↑ disease severity                             | ?                                    | L    | [29]    |
| Rainbow trout<br>( <i>Oncorhynchus mykiss</i> )                        | <i>Flavobacterium columnare</i><br>(6 different bacterial strains)                         | H Trematode fluke<br>( <i>Diplostomum pseudospathaceum</i> ;<br>5 genotypes)                                | H ?/+ | simultaneous                                                             | -       | ↑              | -              | ↑ mortality                                    | ?                                    | L    | [33]    |
| Rainbow trout<br>( <i>Oncorhynchus mykiss</i> )                        | Trematode eye-fluke<br>( <i>Diplostomum pseudospathaceum</i> ;<br>multiple genotypes)      | H Trematode eye-fluke<br>( <i>Diplostomum pseudospathaceum</i> ;<br>multiple genotypes)                     | H ?/+ | simultaneous                                                             | ↑       | -              | -              | -                                              | ?                                    | L    | [34]    |
| Stickleback<br>( <i>Gasterosteus aculeatus</i> )                       | Tapeworm<br>( <i>Schistocephalus solidus</i> ; High and<br>Low growth populations)         | H Tapeworm<br>( <i>Proteocephalus filicolis</i> )                                                           | H ?/+ | F <sup>R</sup> then F <sup>D</sup> (?)                                   | -       | ↑              | -              | -                                              | ?                                    | F    | [35]    |

| Host                                                                                         | Facilitator                                                                                    | Facilitated                                                                      | Sym. | Infection order | success                                            | intensity | transm. | host fitness | Mechanism                                  | Type                                         | Ref. |         |
|----------------------------------------------------------------------------------------------|------------------------------------------------------------------------------------------------|----------------------------------------------------------------------------------|------|-----------------|----------------------------------------------------|-----------|---------|--------------|--------------------------------------------|----------------------------------------------|------|---------|
| Stickleback<br>( <i>Gasterosteus aculeatus</i> )                                             | Tapeworm<br>( <i>Schistocephalus solidus</i> ; High growth populations)                        | Trematode eye-fluke<br>( <i>Diplostomum pseudospathaceum</i> )                   | H    | ?/+             | F <sup>R</sup> then F <sup>D</sup><br>(41-43 days) | -         | ↑       | -            | -                                          | ?                                            | F    | [35]    |
| Citrus mealybugs<br>( <i>Planococcus citri</i> )                                             | β-Proteobacteria                                                                               | γ-Proteobacteria                                                                 | V    | ?/+             | na                                                 | ↑         | -       | ↑            | -                                          | Nested parasite                              | L    | [36]    |
| African armyworm<br>( <i>Spodoptera exempta</i> )                                            | <i>Wolbachia</i><br>(alphaproteobacteria; wExe1 and 2)                                         | Nucleopolyhedrovirus<br>(Armyworm SpexNPV)                                       | V    | ?/+             | na                                                 | ↑         | ↑       | -            | ↑ mortality                                | ?                                            | LF   | [37]    |
| Honeybees<br>( <i>Apis mellifera</i> )                                                       | Parasitic mite<br>( <i>Varroa destructor</i> )                                                 | Deformed wing virus<br>(DWV)                                                     | H    | ?/+             | F <sup>D</sup> then F <sup>R</sup><br>(unknown)    | ↑         | ↑       | -            | ↑ mortality;<br>(colony collapse)          | Immunosuppression                            | F    | [38]    |
| Mosquito<br>( <i>Anopheles gambiae</i> )                                                     | <i>Wolbachia</i><br>(alphaproteobacteria; wAlbB)                                               | Malaria parasite<br>( <i>P. berghei</i> ; ANKA 2.34; protozoan)                  | V    | ?/+             | na                                                 | ↔         | ↑       | -            | ↔ survival                                 | ?                                            | L    | [39]    |
| Mosquito<br>( <i>Culex pipiens</i> ; strain Slab)                                            | <i>Wolbachia</i><br>(alphaproteobacteria; wPip(SI))                                            | Malaria parasite<br>( <i>P. relictum</i> ; strain SGS1; protozoan)               | V    | ?/+             | na                                                 | ↑         | ↑       | -            | ↑ longevity<br>↓ induced mortality         | ?                                            | L    | [40,41] |
| Diverse herbivorous insect<br>vectors and host plants                                        | Potyvirus, waikaviruses,<br>caulimoviruses                                                     | Potato aucuba virus (potyvirus)<br>Rice tungro bacilliform virus<br>(waikavirus) | H    | ?/+             | na                                                 | ↑         | -       | ↑            | na                                         | Transcomplementation                         | R    | [42-44] |
| Diverse plant families and<br>aphid vectors                                                  | <i>Luteoviruses</i>                                                                            | <i>Umbraviruses</i>                                                              | H    | ?/+             | na                                                 | ↑         | -       | ↑            | na                                         | Transcapsidation                             | R    | [45,44] |
| Mousear Cress plant<br>( <i>Arabidopsis thaliana</i> ; mutant<br>nahG and npr1 and WT col-0) | <i>Pseudomonas syringae</i><br>(bacterial phytopathogen; Psm<br>ES4326 and cfa6::Kmr)          | Cabbage looper<br>( <i>Trichoplusia ni</i> ; inbred pop.)                        | H    | ?/+             | F <sup>R</sup> then F <sup>D</sup><br>(4 days)     | -         | ↑       | -            | -                                          | ? <sup>k</sup>                               | L    | [46,47] |
| Mousear Cress plant<br>( <i>Arabidopsis thaliana</i> ; mutant<br>npr1 and WT col-0)          | <i>Pseudomonas syringae</i><br>(bacterial phytopathogen; strains<br>Psm ES4326 and Pst DC3000) | <i>Pseudomonas syringae</i><br>(bacterial phytopathogen; strain<br>Psm ES4326)   | H    | ?/+             | F <sup>R</sup> then F <sup>D</sup><br>(4 days)     | -         | ↑       | -            | ↓ SA-inducible defences                    | Immunosuppression                            | L    | [47]    |
| Mousear Cress plant<br>( <i>Arabidopsis thaliana</i> ; col-0)                                | Tomato Spotted Wilt Virus<br>(Topsovirus ; isolate 0)                                          | Western flower thrips<br>( <i>Frankliniella occidentalis</i> )                   | H    | ?/+             | Simultaneous                                       | -         | ↑       | -            | ↑ feeding scars<br>↑ SA-inducible defences | Behavioural manipulation<br>Immune trade-off | L    | [48]    |
| Pepper plant<br>( <i>Capsicum annuum</i> )                                                   | Tomato Spotted Wilt Virus<br>(Topsovirus )                                                     | Western flower thrips<br>( <i>Frankliniella occidentalis</i> )                   | H    | ?/+             | F <sup>R</sup> then F <sup>D</sup><br>(2 weeks)    | -         | ↑       | -            | -                                          | ?                                            | L    | [49]    |
| Tomato plant<br>( <i>Solanum lycopersicum</i> cv<br>Moneymaker)                              | Tomato Spotted Wilt Virus<br>(Topsovirus ; isolate TSWV-MT2)                                   | Spider mite<br>( <i>Tetranychus urticae</i> )                                    | H    | ?/+             | F <sup>R</sup> then F <sup>D</sup><br>(5 weeks)    | -         | ↑       | -            | ↑ defences ↑ amino acid                    | ?                                            | L    | [50]    |

<sup>a</sup> due to cytoplasmic incompatibility.

<sup>b</sup> population dependent effect

<sup>c</sup> downstream of JA and SA accumulation

<sup>d</sup> only in absence of coinfection: *T. urticae* is outcompeted by *T. evansi* when sharing the same leaf

<sup>e</sup> but no difference in the per capita (per helminth) number of eggs

<sup>f</sup> compensate for the loss of digestive and excretory systems (γ-bacteria produce CO<sub>2</sub> by the oxidation of reduced inorganic compounds e.g. sulphide to sulphate. δ-bacteria reduce sulphate products produced by the γ-bacteria, producing sulphide)

<sup>g</sup> male effect on fecundity

<sup>h</sup> age-dependent effect on intensity

<sup>i</sup> intensity increase in the lungs only

<sup>j</sup> only when the host is feeding on its native host *Pinus sylvestris* but not *P. contorta*

<sup>k</sup> systemic response of the host

## Supplementary References

- 1 Lello, J. *et al.* (2004) Competition and mutualism among the gut helminths of a mammalian host. *Nature* 428, 20–24
- 2 Ford, S.A. *et al.* (2016) Evolution of reduced pathogen virulence. *Nat. Commun.* 7, 1–9
- 3 Fytrou, A. *et al.* (2006) *Wolbachia* infection suppresses both host defence and parasitoid counter-defence *Wolbachia* infection suppresses both host defence and parasitoid counter-defence. *Proc. R. Soc. B* 273, 791–796
- 4 Zhu, L. *et al.* (2012) *Wolbachia* strengthens *Cardinium*-induced cytoplasmic incompatibility in the spider mite *Tetranychus piercei* McGregor. *Curr. Microbiol.* 65, 516–523
- 5 Orsucci, M. *et al.* (2016) Genotype-specific interactions between parasitic arthropods. *Heredity.* 118, 260–265
- 6 Alba, J.M. *et al.* (2015) Spider mites suppress tomato defenses downstream of jasmonate and salicylate independently of hormonal crosstalk. *New Phytol.* 205, 828–840
- 7 Sarmiento, R. *et al.* (2011) A herbivorous mite down-regulates plant defence and produces web to exclude competitors. *PLoS One* 6, e23757
- 8 Oliveira, E.F. De *et al.* (2016) Herbivores with similar feeding modes interact through the induction of different plant responses. *Oecologia* 180, 1–10
- 9 Glas, J.J. *et al.* (2014) Defense suppression benefits herbivores that have a monopoly on their feeding site but can backfire within natural communities. *BMC Biol.* 12, 12–98
- 10 Van Geertruyden, J.P. (2014) Interactions between malaria and human immunodeficiency virus. *Clin. Microbiol. Infect.* 20, 278–285
- 11 Van De Perre, P. *et al.* (2008) Herpes simplex virus and HIV-1: deciphering viral synergy. *Lancet Infect. Dis.* 8, 490–497
- 12 Biancotto, A. *et al.* (2008) Upregulation of human cytomegalovirus by HIV type 1 in human lymphoid tissue ex vivo. *AIDS Res. Hum. Retroviruses* 24, 453–462
- 13 Sheth, P.M. *et al.* (2006) Disproportionately high semen shedding of HIV is associated with compartmentalized cytomegalovirus reactivation. *J. Infect. Dis.* 193, 45–48
- 14 Lass, S. *et al.* (2012) Generating super-shedders: co-infection increases bacterial load and egg production of a gastrointestinal helminth. *J. R. Soc. Interface* 10, 20120588
- 15 Kalhoro, D.H. *et al.* (2016) Canine influenza virus coinfection with *Staphylococcus pseudintermedius* enhances bacterial colonization , virus load and clinical presentation in mice. *BMC Vet. Res.* 12:87
- 16 Woyke, T. *et al.* (2006) Symbiosis insights through metagenomic analysis of a microbial consortium. *Nature* 443, 950–955
- 17 Rode, N. *et al.* (2013) Why join groups? Lessons from parasite-manipulated *Artemia*. *Ecol. Lett.* 16, 493–501
- 18 Herniou, E.A. *et al.* (2013) When parasitic wasps hijacked viruses : genomic and functional evolution of polydnviruses. *Philos. Trans. R. Soc. B* 368, 20130051
- 19 Pollitt, L.C. *et al.* (2015) Existing infection facilitates establishment and density of malaria parasites in their mosquito vector. *PLoS Pathog.* 8, 1–4
- 20 Zhao, D. *et al.* (2013) Multiple infections with *Cardinium* and two strains of *Wolbachia* in the spider mite *Tetranychus phaselus* Ehara: revealing new forces driving the spread of *Wolbachia*. *PLoS One* 8, e54964
- 21 Zhao, D. *et al.* (2013) Host–symbiont interactions in spider mite *Tetranychus truncates* doubly infected with *Wolbachia* and *Cardinium*.

- Environ. Entomol.* 42, 445–452
- 22 Godinho, D.P. *et al.* (2016) Down-regulation of plant defence in a resident spider mite species and its effect upon con- and heterospecifics. *Oecologia* 180, 161–167
- 23 Susi, H. *et al.* (2015) Co-infection alters population dynamics of infectious disease. *Nat. Commun.* 6, 5975
- 24 Susi, H. *et al.* (2015) Host genotype and coinfection modify the relationship of within and between host transmission. *Am. Nat.* 186, 252–263
- 25 Hodgson, D.J. *et al.* (2004) Host ecology determines the relative fitness of virus genotypes in mixed-genotype nucleopolyhedrovirus infections. *J. Evol. Biol.* 17, 1018–25
- 26 Lello, J. *et al.* (2005) The effect of single and concomitant pathogen infections on condition and fecundity of the wild rabbit (*Oryctolagus cuniculus*). *Int. J. Parasitol.* 35, 1509–1515
- 27 Swe, P.M. *et al.* (2014) Scabies mites alter the skin microbiome and promote growth of opportunistic pathogens in a porcine model. *PLoS Negl. Trop. Dis.* 8, 11–14
- 28 Mina, M.J. *et al.* (2014) Live attenuated influenza vaccine enhances colonization of *Streptococcus pneumoniae* and *Staphylococcus aureus* in mice. *MBio* 5, 1–10
- 29 McCullers, J.A. *et al.* (2010) Influenza enhances susceptibility to natural acquisition of and disease due to *Streptococcus pneumoniae* in ferrets. *J. Infect. Dis.* 202, 1287–1295
- 30 Siegel, S.J. *et al.* (2014) Influenza promotes pneumococcal growth during coinfection by providing host sialylated substrates as a nutrient source. *Cell Host Microbe* 16, 55–67
- 31 Ramiro, R.S. *et al.* (2016) Facilitation through altered resource availability in a mixed-species rodent malaria infection. *Ecol. Lett.* 19, 1041–1050
- 32 Apiwattanakul, N. *et al.* (2014) Chronic helminth infections impair pneumococcal vaccine responses. *Vaccine* 42, 5405–5410
- 33 Louhi, K.-R. *et al.* (2015) Interactions among bacterial strains and fluke genotypes shape virulence of co-infection. *Proc. R. Soc. B* 282, 20152097
- 34 Klemme, I. *et al.* (2016) Host infection history modifies co-infection success of multiple parasite genotypes. *J. Anim. Ecol.* 85, 591–597
- 35 Benesh, D.P. and Kalbe, M. (2016) Experimental parasite community ecology: intraspecific variation in a large tapeworm affects community assembly. *J. Anim. Ecol.* 85, 1004–1013
- 36 von Dohlen, C. *et al.* (2016) Mealybug beta-proteobacterial endosymbionts contain gamma-proteobacterial symbionts. *Nature* 412, 433–436
- 37 Graham, R.I. and Mushobozi, W.L. (2012) *Wolbachia* in a major African crop pest increases susceptibility to viral disease rather than protects. *Ecol. Lett.* 15, 993–1000
- 38 Nazi, F. *et al.* (2012) Synergistic parasite-pathogen interactions mediated by host immunity can drive the collapse of honeybee colonies. *PLoS Biol.* 8, e1002735
- 39 Hughes, G.L. *et al.* (2014) *Wolbachia* can enhance *Plasmodium* infection in mosquitoes: implications for malaria control? *Plos Biol.* 10, 21–24
- 40 Zélé, F. *et al.* (2012) Infection with *Wolbachia* protects mosquitoes against *Plasmodium*-induced mortality in a natural system. *J. Evol. Biol.* 25, 1243–52

- 41 Zélé, F. *et al.* (2014) *Wolbachia* increases susceptibility to *Plasmodium* infection in a natural system. *Proc. R. Soc. B* 281, 20132837
- 42 Froissart, R. *et al.* (2002) Helper component-transcomplementation in the vector transmission of plant viruses. *Phytopathology* 92, 576–579
- 43 Pirone, T. and Blanc, S. (1996) Helper-dependent vector transmission of plant viruses. *Annu. Rev. Phytopathol.* 34, 227–247
- 44 Syller, J. (2012) Facilitative and antagonistic interactions between plant viruses in mixed infections. *Mol. Plant Pathol.* 13, 204–216
- 45 Taliansky, M.E. and Robinson, D.J. (2003) Molecular biology of umbraviruses : phantom warriors. *Journal Gen. Virol.* 2, 1951–1960
- 46 Cui, J. *et al.* (2002) Signals involved in Arabidopsis resistance to *Trichoplusia ni* caterpillars induced by virulent and avirulent strains of the phytopathogen *Pseudomonas syringae*. *Plant Physiol.* 129, 551–564
- 47 Cui, J. *et al.* (2005) *Pseudomonas syringae* manipulates systemic plant defenses against pathogens and herbivores. *Proc. Natl. Acad. Sci.* 102, 1791–1796
- 48 Abe, H. *et al.* (2012) Antagonistic plant defense system regulated by phytohormones assists interactions among vector insect, thrips and a tospovirus. *Plant Cell Physiol.* 53, 204–212
- 49 Belliure, B. *et al.* (2005) Herbivore arthropods benefit from vectoring plant viruses. *Ecol. Lett.* 8, 70–79
- 50 Nachappa, P. *et al.* (2013) Tomato spotted wilt virus benefits a non-vector arthropod, *Tetranychus urticae*, by modulating different plant responses in tomato. *PLoS One* 8, e75909
